# Supplementary material for: Linking the distribution of microbial deposits from the Great Salt Lake (Utah, USA) to tectonic and climatic processes
Source: Copernicus journal article supplement (doi:10.5194/bg-2015-647), 2016-03-11
Supplement: Supplementary file 1 [file bg-2015-647-supplement.pdf]

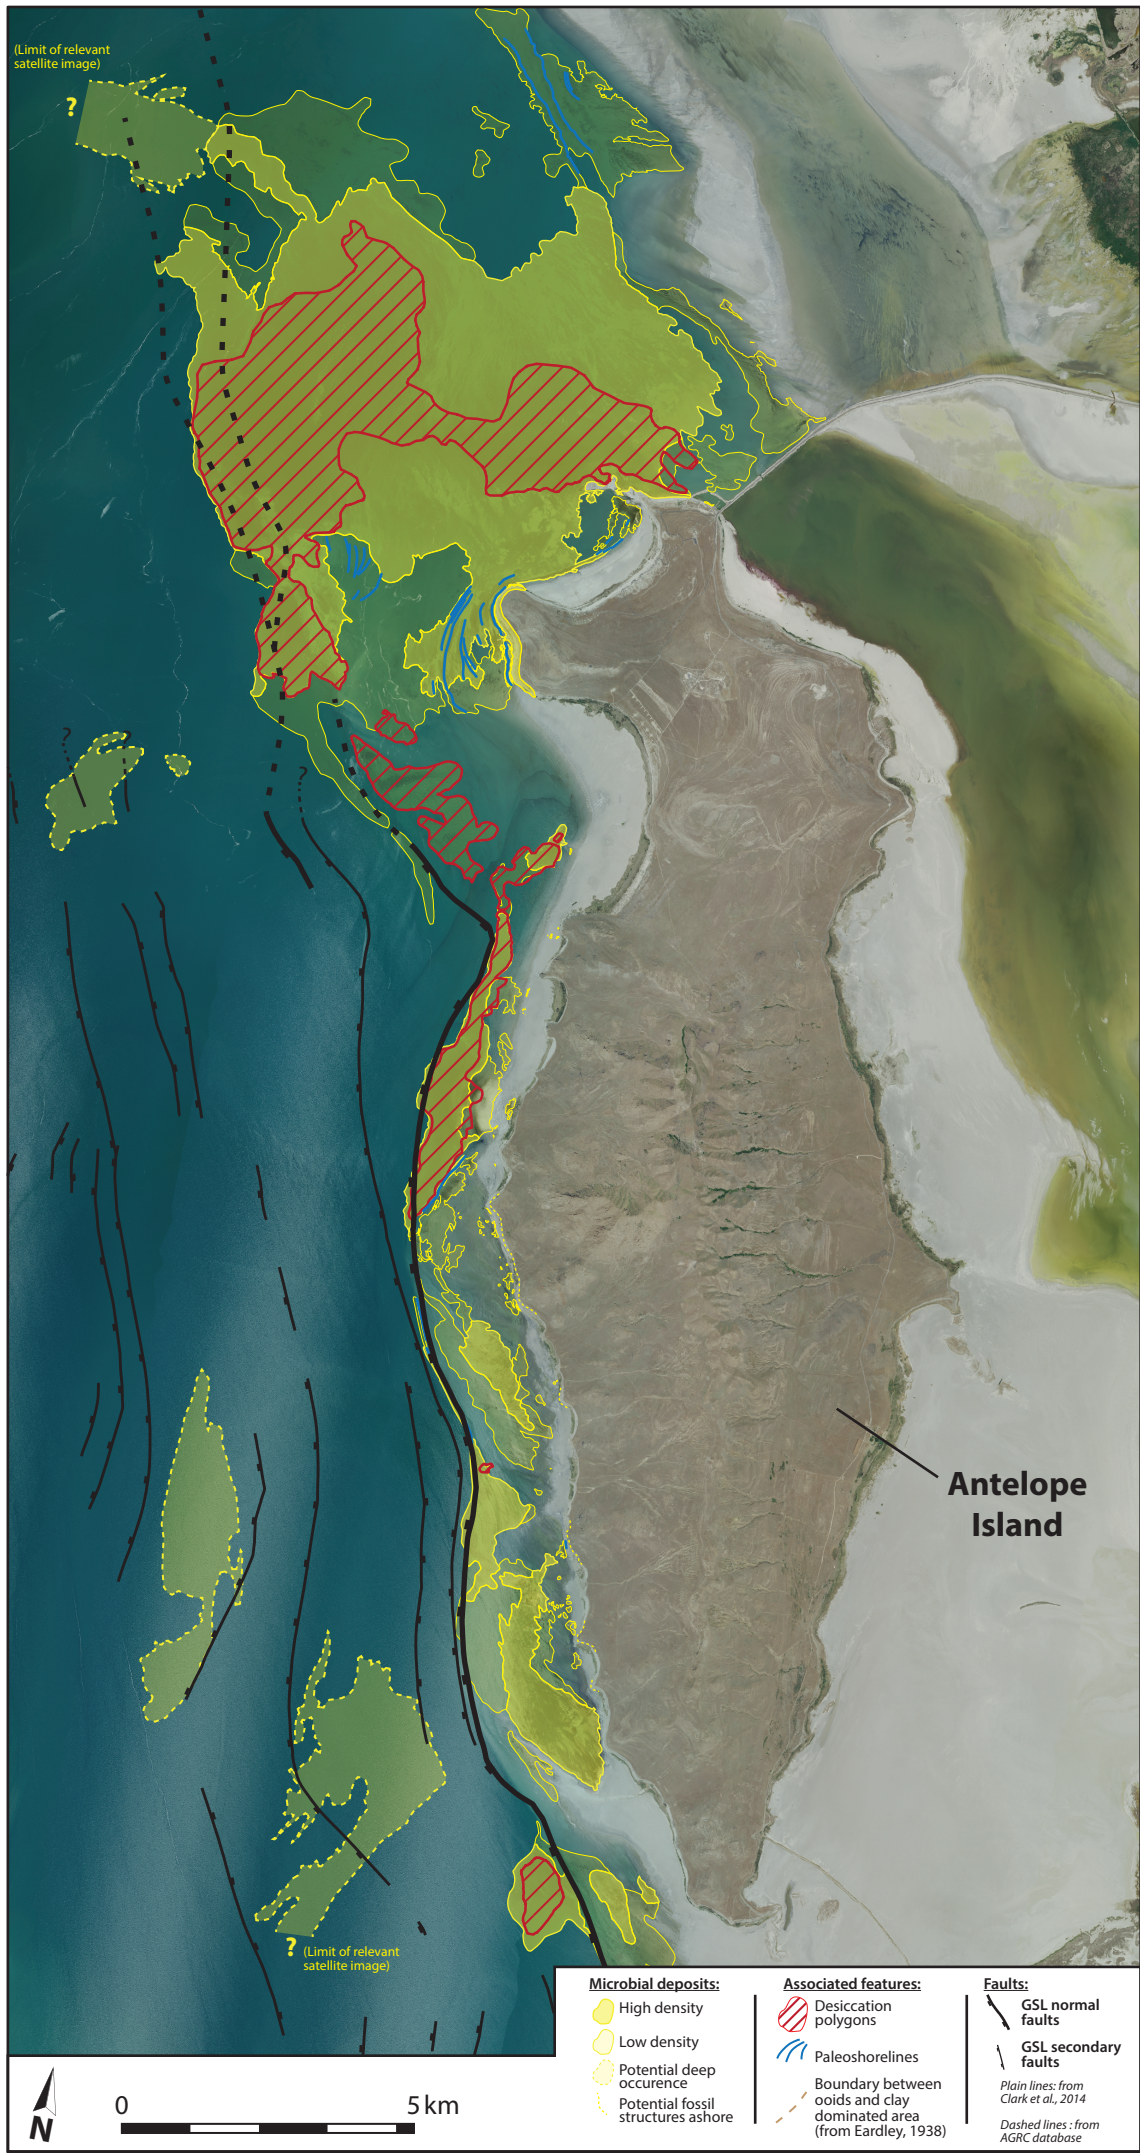

**Fig. S1** Detailed distribution and organization of the microbial deposits and sedimentary structures at the eastern margin of Antelope Island, Great Salt Lake, Utah, USA.
